# Supplementary material for: A Study on Plant Selection for Low-Carbon Rain Gardens Based on an AHP-TOPSIS Model
Source: MDPI journal article supplement (doi:10.3390/su16052097), 2024-03-02
Supplement: s1 [file s1]

Table S1 Tree A-B, B-C judgment matrix (Expert 2, a scholar in the field of environment)

| Tree A-B judgment matrix                                                                                                           | Tree B1-C judgment matrix                                                                   | Tree B2-C judgment matrix                                                                                                               | Tree B3-C judgment matrix                                                                                                                                                                                                                                                                             |
|------------------------------------------------------------------------------------------------------------------------------------|---------------------------------------------------------------------------------------------|-----------------------------------------------------------------------------------------------------------------------------------------|-------------------------------------------------------------------------------------------------------------------------------------------------------------------------------------------------------------------------------------------------------------------------------------------------------|
| A    B1   B2   B3<br>B1   1   1/8   1/6<br>B2   8   1   1/4<br>B3   6   1/4   1<br><br>$\lambda_{\max}=2.7053$ , CR=<br>-0.28<0.10 | B1    C1    C2<br>C1    1    1/8<br><br>C2    8    1<br><br>$\lambda_{\max}=2$ , CR= 0<0.10 | B2   C3   C4   C5<br>C3   1   8   3<br><br>C4   1/8   1   1/5<br><br>C5   1/3   5   1<br><br>$\lambda_{\max}=3.0441$ , CR=<br>0.04<0.10 | B3   C6   C7   C8   C9   C10   C11<br>C6   1   4   5   1/3   6   1/2<br>C7   1/4   1   3   1/5   4   1/6<br>C8   1/5   1/3   1   1/6   2   1/7<br>C9   3   5   6   1   8   2<br>C10   1/6   1/4   1/2   1/9   1   1/8<br>C11   2   6   7   1/2   8   1<br><br>$\lambda_{\max}=6.2811$ , CR= 0.05<0.10 |

| Shrub A-B judgment matrix                                                                                                       | Shrub B1-C judgment matrix                                                                  | Shrub B2-C judgment matrix                                                                                                              | Shrub B3-C judgment matrix                                                                                                                                                                                                                                                                            |
|---------------------------------------------------------------------------------------------------------------------------------|---------------------------------------------------------------------------------------------|-----------------------------------------------------------------------------------------------------------------------------------------|-------------------------------------------------------------------------------------------------------------------------------------------------------------------------------------------------------------------------------------------------------------------------------------------------------|
| A    B1   B2   B3<br>B1   1   1/7   1/5<br>B2   7   1   3<br>B3   5   1/3   1<br><br>$\lambda_{\max}=3.0649$ , CR=<br>0.05<0.10 | B1    C1    C2<br>C1    1    1/3<br><br>C2    3    1<br><br>$\lambda_{\max}=2$ , CR= 0<0.10 | B2   C3   C4   C5<br>C3   1   5   4<br><br>C4   1/5   1   2<br><br>C5   1/4   1/2   1<br><br>$\lambda_{\max}=3.0940$ , CR=<br>0.09<0.10 | B3   C6   C7   C8   C9   C10   C11<br>C6   1   6   5   4   1/5   1/4<br>C7   1/6   1   1/2   1/5   1/9   1/7<br>C8   1/5   2   1   1/4   1/8   1/6<br>C9   1/4   5   4   1   1/6   1/5<br>C10   5   9   8   6   1   2<br>C11   4   7   6   5   1/2   1<br><br>$\lambda_{\max}=6.5463$ , CR= 0.09<0.10 |

| Herbaceous plant A-B judgment matrix                                                                                                    | Herbaceous plant B1-C judgment matrix                                                       | Herbaceous plant B2-C judgment matrix                                                                                                      | Herbaceous plant B3-C judgment matrix                                                                                                                                                                                                                                                                 |
|-----------------------------------------------------------------------------------------------------------------------------------------|---------------------------------------------------------------------------------------------|--------------------------------------------------------------------------------------------------------------------------------------------|-------------------------------------------------------------------------------------------------------------------------------------------------------------------------------------------------------------------------------------------------------------------------------------------------------|
| A    B1   B2   B3<br>B1   1   1/5   1/4<br><br>B2   5   1   3<br><br>B3   4   1/3   1<br><br>$\lambda_{\max}=3.0858$ , CR=<br>0.08<0.10 | B1    C1    C2<br>C1    1    1/3<br><br>C2    3    1<br><br>$\lambda_{\max}=2$ , CR= 0<0.10 | B2   C3   C4   C5<br>C3   1   3   5<br><br>C4   1/3   1   1/4<br><br>C5   1/5   1/4   1<br><br>$\lambda_{\max}=2.5577$ , CR=<br>-0.42<0.10 | B3   C6   C7   C8   C9   C10   C11<br>C6   1   4   1/8   3   1/2   2<br>C7   1/4   1   1/9   1/2   1/8   1/3<br>C8   8   9   1   6   2   3<br>C9   1/3   2   1/6   1   1/5   1/2<br>C10   2   8   1/2   5   1   4<br>C11   1/2   3   1/3   2   1/4   1<br><br>$\lambda_{\max}=6.2758$ , CR= 0.04<0.10 |

Table S2 Tree A-B, B-C judgment matrix (Expert 3, a scholar in the field of environment)

| Tree A-B judgment matrix                                                                                                             | Tree B1-C judgment matrix                                                                   | Tree B2-C judgment matrix                                                                                                                       | Tree B3-C judgment matrix                                                                                                                                                                                                                                                                                                                       |
|--------------------------------------------------------------------------------------------------------------------------------------|---------------------------------------------------------------------------------------------|-------------------------------------------------------------------------------------------------------------------------------------------------|-------------------------------------------------------------------------------------------------------------------------------------------------------------------------------------------------------------------------------------------------------------------------------------------------------------------------------------------------|
| A    B1    B2    B3<br>B1    1    1/7    1/4<br>B2    7    1    4<br>B3    4    1/4    1<br><br>$\lambda_{\max}=3.0764$ CR=0.07<0.10 | B1    C1    C2<br>C1    1    1/3<br><br>C2    3    1<br><br>$\lambda_{\max}=2$ , CR= 0<0.10 | B2    C3    C4    C5<br>C3    1    4    6<br><br>C4    1/4    1    3<br><br>C5    1/6    1/3    1<br><br>$\lambda_{\max}=3.0536$ , CR=0.05<0.10 | B3    C6    C7    C8    C9    C10    C11<br>C6    1    1/6    3    1/3    1/4    1/5<br>C7    6    1    8    5    3    2<br>C8    1/3    1/8    1    1/2    1/5    1/6<br>C9    3    1/5    2    1    1/3    1/4<br>C10    4    1/3    5    3    1    1/2<br>C11    5    1/2    6    4    2    1<br><br>$\lambda_{\max}=6.2752$ , CR= 0.04<0.10 |

| Shrub A-B judgment matrix                                                                                                                | Shrub B1-C judgment matrix                                                                  | Shrub B2-C judgment matrix                                                                                                                       | Shrub B3-C judgment matrix                                                                                                                                                                                                                                                                                                                      |
|------------------------------------------------------------------------------------------------------------------------------------------|---------------------------------------------------------------------------------------------|--------------------------------------------------------------------------------------------------------------------------------------------------|-------------------------------------------------------------------------------------------------------------------------------------------------------------------------------------------------------------------------------------------------------------------------------------------------------------------------------------------------|
| A    B1    B2    B3<br>B1    1    1/5    1/3<br>B2    5    1    2<br>B3    3    1/2    1<br><br>$\lambda_{\max}=3.0037$ , CR=0.0036<0.10 | B1    C1    C2<br>C1    1    1/5<br><br>C2    5    1<br><br>$\lambda_{\max}=2$ , CR= 0<0.10 | B2    C3    C4    C5<br>C3    1    3    5<br><br>C4    1/3    1    2<br><br>C5    1/5    1/2    1<br><br>$\lambda_{\max}=3.037$ , CR=0.0036<0.10 | B3    C6    C7    C8    C9    C10    C11<br>C6    1    2    5    4    7    1/3<br>C7    1/2    1    4    2    6    1/4<br>C8    1/5    1/4    1    1/3    1/2    1/9<br>C9    1/4    1/2    3    1    2    1/5<br>C10    1/7    1/6    2    1/2    1    1/8<br>C11    3    4    9    5    8    1<br><br>$\lambda_{\max}=6.2403$ , CR= 0.04<0.10 |

| Herbaceous plant A-B judgment matrix                                                                                                           | Herbaceous plant B1-C judgment matrix                                                       | Herbaceous plant B2-C judgment matrix                                                                                                           | Herbaceous plant B3-C judgment matrix                                                                                                                                                                                                                                                                                                            |
|------------------------------------------------------------------------------------------------------------------------------------------------|---------------------------------------------------------------------------------------------|-------------------------------------------------------------------------------------------------------------------------------------------------|--------------------------------------------------------------------------------------------------------------------------------------------------------------------------------------------------------------------------------------------------------------------------------------------------------------------------------------------------|
| A    B1    B2    B3<br>B1    1    1/4    1/3<br><br>B2    4    1    2<br><br>B3    3    1/2    1<br><br>$\lambda_{\max}=3.0183$ , CR=0.02<0.10 | B1    C1    C2<br>C1    1    1/6<br><br>C2    6    1<br><br>$\lambda_{\max}=2$ , CR= 0<0.10 | B2    C3    C4    C5<br>C3    1    3    4<br><br>C4    1/3    1    2<br><br>C5    1/4    1/2    1<br><br>$\lambda_{\max}=3.0183$ , CR=0.02<0.10 | B3    C6    C7    C8    C9    C10    C11<br>C6    1    3    5    8    6    1/4<br>C7    1/3    1    3    7    5    1/5<br>C8    1/5    1/3    1    5    4    1/6<br>C9    1/8    1/7    1/5    1    1/3    1/9<br>C10    1/6    1/5    1/4    3    1    1/8<br>C11    4    5    6    9    8    1<br><br>$\lambda_{\max}=6.5996$ , CR= 0.095<0.10 |

Table S3 Tree A-B, B-C judgment matrix (Expert 4, from the environmental protection industry)

| Tree A-B judgment matrix                                                                                                                           | Tree B1-C judgment matrix                                                                                  | Tree B2-C judgment matrix                                                                                                                           | Tree B3-C judgment matrix                                                                                                                                                                                                                                                                                                                           |
|----------------------------------------------------------------------------------------------------------------------------------------------------|------------------------------------------------------------------------------------------------------------|-----------------------------------------------------------------------------------------------------------------------------------------------------|-----------------------------------------------------------------------------------------------------------------------------------------------------------------------------------------------------------------------------------------------------------------------------------------------------------------------------------------------------|
| A    B1    B2    B3<br><br>B1    1    1/7    1/5<br><br>B2    7    1    3<br><br>B3    5    1/3    1<br><br>$\lambda_{\max}=3.0649$ , CR=0.06<0.10 | B<br>1    C1    C2<br><br>C<br>1    1    1/5<br><br>C<br>2    5    1<br><br>$\lambda_{\max}=2$ , CR=0<0.10 | B2    C3    C4    C5<br><br>C3    1    1/5    1/3<br><br>C4    5    1    3<br><br>C5    3    1/3    1<br><br>$\lambda_{\max}=3.0385$ , CR=0.04<0.10 | B3    C6    C7    C8    C9    C10    C11<br><br>C6    1    5    8    3    9    7<br>C7    1/5    1    5    1/4    7    3<br>C8    1/8    1/5    1    1/7    4    1/3<br>C9    1/3    4    7    1    8    5<br>C10    1/9    1/7    1/4    1/8    1    1/5<br>C11    1/7    1/3    3    1/5    5    1<br><br>$\lambda_{\max}=6.6059$ , CR=0.096<0.10 |

| Shrub A-B judgment matrix                                                                                                                           | Shrub B1-C judgment matrix                                                                                 | Shrub B2-C judgment matrix                                                                                                                          | Shrub B3-C judgment matrix                                                                                                                                                                                                                                                                                                                        |
|-----------------------------------------------------------------------------------------------------------------------------------------------------|------------------------------------------------------------------------------------------------------------|-----------------------------------------------------------------------------------------------------------------------------------------------------|---------------------------------------------------------------------------------------------------------------------------------------------------------------------------------------------------------------------------------------------------------------------------------------------------------------------------------------------------|
| A    B1    B2    B3<br><br>B1    1    1/7    1/6<br><br>B2    7    1    3<br><br>B3    6    1/3    1<br><br>$\lambda_{\max}=3.0999$ , CR=0.096<0.10 | B<br>1    C1    C2<br><br>C<br>1    1    1/2<br><br>C<br>2    2    1<br><br>$\lambda_{\max}=2$ , CR=0<0.10 | B2    C3    C4    C5<br><br>C3    1    1/3    1/5<br><br>C4    3    1    1/3<br><br>C5    5    3    1<br><br>$\lambda_{\max}=3.0385$ , CR=0.04<0.10 | B3    C6    C7    C8    C9    C10    C11<br><br>C6    1    5    7    3    9    6<br>C7    1/5    1    5    1/3    6    2<br>C8    1/7    1/5    1    1/6    4    1/3<br>C9    1/3    3    6    1    7    5<br>C10    1/9    1/6    1/4    1/7    1    1/5<br>C11    1/6    1/2    3    1/5    5    1<br><br>$\lambda_{\max}=6.4826$ CR= 0.08<0.10 |

| Herbaceous plant A-B judgment matrix                                                                                                               | Herbaceous plant B1-C judgment matrix                                                                      | Herbaceous plant B2-C judgment matrix                                                                                                               | Herbaceous plant B3-C judgment matrix                                                                                                                                                                                                                                                                                                               |
|----------------------------------------------------------------------------------------------------------------------------------------------------|------------------------------------------------------------------------------------------------------------|-----------------------------------------------------------------------------------------------------------------------------------------------------|-----------------------------------------------------------------------------------------------------------------------------------------------------------------------------------------------------------------------------------------------------------------------------------------------------------------------------------------------------|
| A    B1    B2    B3<br><br>B1    1    1/3    1/5<br><br>B2    3    1    1/3<br><br>B3    5    3    1<br><br>$\lambda_{\max}=3.0385$ , CR=0.04<0.10 | B<br>1    C1    C2<br><br>C<br>1    1    1/5<br><br>C<br>2    5    1<br><br>$\lambda_{\max}=2$ , CR=0<0.10 | B2    C3    C4    C5<br><br>C3    1    1/3    1/5<br><br>C4    3    1    1/4<br><br>C5    5    4    1<br><br>$\lambda_{\max}=3.0358$ , CR=0.08<0.10 | B3    C6    C7    C8    C9    C10    C11<br><br>C6    1    5    3    6    8    4<br>C7    1/5    1    1/4    2    3    1/3<br>C8    1/3    4    1    5    7    3<br>C9    1/6    1/2    1/5    1    4    1/4<br>C10    1/8    1/3    1/7    1/4    1    1/5<br>C11    1/4    3    1/3    4    5    1<br><br>$\lambda_{\max}=6.4022$ , CR= 0.06<0.10 |

Table S4 Tree A-B, B-C judgment matrix (Expert 5, from the environmental protection industry)

| Tree A-B judgment matrix                                                                                                   | Tree B1-C judgment matrix                                                             | Tree B2-C judgment matrix                                                                                                           | Tree B3-C judgment matrix                                                                                                                                                                                                                                                                             |
|----------------------------------------------------------------------------------------------------------------------------|---------------------------------------------------------------------------------------|-------------------------------------------------------------------------------------------------------------------------------------|-------------------------------------------------------------------------------------------------------------------------------------------------------------------------------------------------------------------------------------------------------------------------------------------------------|
| A   B1   B2   B3<br>B1   1   2   1/4<br>B2   1/2   1   1/5<br>B3   4   5   1<br><br>$\lambda_{\max}=3.0246$ , CR=0.02<0.10 | B1   C1   C2<br>C1   1   1/6<br><br>C2   6   1<br><br>$\lambda_{\max}=2$ , CR= 0<0.10 | B2   C3   C4   C5<br>C3   1   1/3   5<br><br>C4   3   1   6<br><br>C5   1/5   1/6   1<br><br>$\lambda_{\max}=3.0940$ , CR=0.09<0.10 | B3   C6   C7   C8   C9   C10   C11<br>C6   1   6   3   1/3   2   4<br>C7   1/6   1   1/4   1/8   1/5   1/2<br>C8   1/3   4   1   1/5   1/2   2<br>C9   3   8   5   1   4   6<br>C10   1/2   5   2   1/4   1   3<br>C11   1/4   2   1/2   1/6   1/3   1<br><br>$\lambda_{\max}=6.1700$ , CR= 0.03<0.10 |

| Shrub A-B judgment matrix                                                                                                  | Shrub B1-C judgment matrix                                                            | Shrub B2-C judgment matrix                                                                                                          | Shrub B3-C judgment matrix                                                                                                                                                                                                                                                                            |
|----------------------------------------------------------------------------------------------------------------------------|---------------------------------------------------------------------------------------|-------------------------------------------------------------------------------------------------------------------------------------|-------------------------------------------------------------------------------------------------------------------------------------------------------------------------------------------------------------------------------------------------------------------------------------------------------|
| A   B1   B2   B3<br>B1   1   1/3   1/5<br>B2   3   1   1/4<br>B3   5   4   1<br><br>$\lambda_{\max}=3.0838$ , CR=0.08<0.10 | B1   C1   C2<br>C1   1   1/5<br><br>C2   5   1<br><br>$\lambda_{\max}=2$ , CR= 0<0.10 | B2   C3   C4   C5<br>C3   1   1/4   3<br><br>C4   4   1   5<br><br>C5   1/3   1/5   1<br><br>$\lambda_{\max}=3.0858$ , CR=0.08<0.10 | B3   C6   C7   C8   C9   C10   C11<br>C6   1   6   5   1/2   1/4   3<br>C7   1/6   1   1/3   1/7   1/8   1/4<br>C8   1/5   3   1   1/6   1/7   1/2<br>C9   2   7   6   1   1/2   3<br>C10   4   8   7   2   1   5<br>C11   1/3   4   2   1/3   1/5   1<br><br>$\lambda_{\max}=6.2661$ , CR= 0.04<0.10 |

| Herbaceous plant A-B judgment matrix                                                                                               | Herbaceous plant B1-C judgment matrix                                                 | Herbaceous plant B2-C judgment matrix                                                                                               | Herbaceous plant B3-C judgment matrix                                                                                                                                                                                                                                                                 |
|------------------------------------------------------------------------------------------------------------------------------------|---------------------------------------------------------------------------------------|-------------------------------------------------------------------------------------------------------------------------------------|-------------------------------------------------------------------------------------------------------------------------------------------------------------------------------------------------------------------------------------------------------------------------------------------------------|
| A   B1   B2   B3<br>B1   1   1/2   1/3<br><br>B2   2   1   1/3<br><br>B3   3   3   1<br><br>$\lambda_{\max}=3.0536$ , CR=0.05<0.10 | B1   C1   C2<br>C1   1   1/4<br><br>C2   4   1<br><br>$\lambda_{\max}=2$ , CR= 0<0.10 | B2   C3   C4   C5<br>C3   1   1/4   1/3<br><br>C4   4   1   3<br><br>C5   3   1/3   1<br><br>$\lambda_{\max}=3.0735$ , CR=0.07<0.10 | B3   C6   C7   C8   C9   C10   C11<br>C6   1   7   6   4   5   3<br>C7   1/7   1   1/2   1/5   1/4   1/6<br>C8   1/6   2   1   1/3   1/2   1/5<br>C9   1/4   5   3   1   2   1/3<br>C10   1/5   4   2   1/2   1   1/4<br>C11   1/3   6   5   3   4   1<br><br>$\lambda_{\max}=6.2775$ , CR= 0.04<0.10 |

Table S5 Tree A-B, B-C judgment matrix (Expert 6, from the landscape design industry)

| Tree A-B judgment matrix                                                                                                | Tree B1-C judgment matrix                                                     | Tree B2-C judgment matrix                                                                                                | Tree B3-C judgment matrix                                                                                                                                                                                                                                                                         |
|-------------------------------------------------------------------------------------------------------------------------|-------------------------------------------------------------------------------|--------------------------------------------------------------------------------------------------------------------------|---------------------------------------------------------------------------------------------------------------------------------------------------------------------------------------------------------------------------------------------------------------------------------------------------|
| A   B1   B2   B3<br>B1   1   1/3   1/7<br>B2   3   1   1/6<br>B3   7   6   1<br>$\lambda_{\max}=3.0999$ , CR=0.096<0.10 | B1   C1   C2<br>C1   1   1/8<br>C2   8   1<br>$\lambda_{\max}=2$ , CR= 0<0.10 | B2   C3   C4   C5<br>C3   1   5   3<br>C4   1/5   1   1/2<br>C5   1/3   2   1<br>$\lambda_{\max}=3.0037$ , CR=0.004<0.10 | B3   C6   C7   C8   C9   C10   C11<br>C6   1   8   5   3   7   4<br>C7   1/8   1   1/3   1/7   1/2   1/4<br>C8   1/5   3   1   1/3   2   1/2<br>C9   1/3   7   3   1   6   2<br>C10   1/7   2   1/2   1/6   1   1/5<br>C11   1/4   4   2   1/2   5   1<br>$\lambda_{\max}=6.1934$ , CR= 0.04<0.10 |

| Shrub A-B judgment matrix                                                                                              | Shrub B1-C judgment matrix                                                    | Shrub B2-C judgment matrix                                                                                              | Shrub B3-C judgment matrix                                                                                                                                                                                                                                                                        |
|------------------------------------------------------------------------------------------------------------------------|-------------------------------------------------------------------------------|-------------------------------------------------------------------------------------------------------------------------|---------------------------------------------------------------------------------------------------------------------------------------------------------------------------------------------------------------------------------------------------------------------------------------------------|
| A   B1   B2   B3<br>B1   1   1/4   1/5<br>B2   4   1   1/3<br>B3   5   3   1<br>$\lambda_{\max}=3.0858$ , CR=0.08<0.10 | B1   C1   C2<br>C1   1   1/2<br>C2   2   1<br>$\lambda_{\max}=2$ , CR= 0<0.10 | B2   C3   C4   C5<br>C3   1   3   1/4<br>C4   1/3   1   1/5<br>C5   4   5   1<br>$\lambda_{\max}=3.0858$ , CR=0.08<0.10 | B3   C6   C7   C8   C9   C10   C11<br>C6   1   1/4   4   1/3   6   5<br>C7   4   1   5   1/2   8   7<br>C8   1/4   1/5   1   1/6   5   4<br>C9   3   2   6   1   9   8<br>C10   1/6   1/8   1/5   1/9   1   1/2<br>C11   1/5   1/7   1/4   1/8   2   1<br>$\lambda_{\max}=6.4533$ , CR= 0.07<0.10 |

| Herbaceous plant A-B judgment matrix                                                                                    | Herbaceous plant B1-C judgment matrix                                         | Herbaceous plant B2-C judgment matrix                                                                                   | Herbaceous plant B3-C judgment matrix                                                                                                                                                                                                                                                             |
|-------------------------------------------------------------------------------------------------------------------------|-------------------------------------------------------------------------------|-------------------------------------------------------------------------------------------------------------------------|---------------------------------------------------------------------------------------------------------------------------------------------------------------------------------------------------------------------------------------------------------------------------------------------------|
| A   B1   B2   B3<br>B1   1   1/8   1/3<br>B2   8   1   2<br>B3   3   1/2   1<br>$\lambda_{\max}=3.0092$ , CR=0.009<0.10 | B1   C1   C2<br>C1   1   1/6<br>C2   6   1<br>$\lambda_{\max}=2$ , CR= 0<0.10 | B2   C3   C4   C5<br>C3   1   3   1/5<br>C4   1/3   1   1/6<br>C5   5   6   1<br>$\lambda_{\max}=3.0940$ , CR=0.09<0.10 | B3   C6   C7   C8   C9   C10   C11<br>C6   1   9   3   5   6   7<br>C7   1/9   1   1/7   1/5   1/3   1/2<br>C8   1/3   7   1   4   5   6<br>C9   1/5   5   1/4   1   2   3<br>C10   1/6   3   1/5   1/2   1   2<br>C11   1/7   2   1/6   1/3   1/2   1<br>$\lambda_{\max}=6.2624$ , CR= 0.04<0.10 |

Table S6 Tree A-B, B-C judgment matrix (Expert 7, from the landscape design industry)

| Tree A-B judgment matrix                                                                                                    | Tree B1-C judgment matrix                                                                   | Tree B2-C judgment matrix                                                                                                           | Tree B3-C judgment matrix                                                                                                                                                                                                                                                                             |
|-----------------------------------------------------------------------------------------------------------------------------|---------------------------------------------------------------------------------------------|-------------------------------------------------------------------------------------------------------------------------------------|-------------------------------------------------------------------------------------------------------------------------------------------------------------------------------------------------------------------------------------------------------------------------------------------------------|
| A    B1   B2   B3<br>B1   1   1/3   1/5<br>B2   3   1   1/4<br>B3   5   4   1<br><br>$\lambda_{\max}=3.0858$ , CR=0.08<0.10 | B1    C1    C2<br>C1    1    1/4<br><br>C2    4    1<br><br>$\lambda_{\max}=2$ , CR= 0<0.10 | B2   C3   C4   C5<br>C3   1   1/5   2<br><br>C4   5   1   4<br><br>C5   1/2   1/4   1<br><br>$\lambda_{\max}=3.0390$ , CR=0.09<0.10 | B3   C6   C7   C8   C9   C10   C11<br>C6   1   5   2   4   1/2   1/5<br>C7   1/5   1   1/3   1/2   1/6   1/8<br>C8   1/2   3   1   2   1/4   1/6<br>C9   1/4   2   1/2   1   1/5   1/7<br>C10   2   6   4   5   1   1/3<br>C11   5   8   6   7   3   1<br><br>$\lambda_{\max}=6.2110$ , CR= 0.03<0.10 |

| Shrub A-B judgment matrix                                                                                                   | Shrub B1-C judgment matrix                                                                  | Shrub B2-C judgment matrix                                                                                                          | Shrub B3-C judgment matrix                                                                                                                                                                                                                                                                            |
|-----------------------------------------------------------------------------------------------------------------------------|---------------------------------------------------------------------------------------------|-------------------------------------------------------------------------------------------------------------------------------------|-------------------------------------------------------------------------------------------------------------------------------------------------------------------------------------------------------------------------------------------------------------------------------------------------------|
| A    B1   B2   B3<br>B1   1   1/3   1/4<br>B2   3   1   1/2<br>B3   4   2   1<br><br>$\lambda_{\max}=3.0813$ , CR=0.02<0.10 | B1    C1    C2<br>C1    1    1/3<br><br>C2    3    1<br><br>$\lambda_{\max}=2$ , CR= 0<0.10 | B2   C3   C4   C5<br>C3   1   1/4   3<br><br>C4   4   1   5<br><br>C5   1/3   1/5   1<br><br>$\lambda_{\max}=3.0858$ , CR=0.08<0.10 | B3   C6   C7   C8   C9   C10   C11<br>C6   1   2   1/2   1/3   1/5   1/4<br>C7   1/2   1   1/5   1/4   1/7   1/6<br>C8   2   5   1   1/2   1/4   1/3<br>C9   3   4   2   1   1/3   1/2<br>C10   5   7   4   3   1   2<br>C11   4   6   3   2   1/2   1<br><br>$\lambda_{\max}=6.1571$ , CR= 0.02<0.10 |

| Herbaceous plant A-B judgment matrix                                                                                        | Herbaceous plant B1-C judgment matrix                                                       | Herbaceous plant B2-C judgment matrix                                                                                               | Herbaceous plant B3-C judgment matrix                                                                                                                                                                                                                                                                 |
|-----------------------------------------------------------------------------------------------------------------------------|---------------------------------------------------------------------------------------------|-------------------------------------------------------------------------------------------------------------------------------------|-------------------------------------------------------------------------------------------------------------------------------------------------------------------------------------------------------------------------------------------------------------------------------------------------------|
| A    B1   B2   B3<br>B1   1   1/2   1/5<br>B2   2   1   1/4<br>B3   5   4   1<br><br>$\lambda_{\max}=3.0246$ , CR=0.02<0.10 | B1    C1    C2<br>C1    1    1/4<br><br>C2    4    1<br><br>$\lambda_{\max}=2$ , CR= 0<0.10 | B2   C3   C4   C5<br>C3   1   1/3   1/5<br><br>C4   3   1   1/4<br><br>C5   5   4   1<br><br>$\lambda_{\max}=3.0858$ , CR=0.08<0.10 | B3   C6   C7   C8   C9   C10   C11<br>C6   1   1/2   3   2   1/4   1/6<br>C7   2   1   5   4   1/3   1/5<br>C8   1/3   1/5   1   1/2   1/6   1/8<br>C9   1/2   1/4   2   1   1/5   1/7<br>C10   4   3   6   5   1   1/3<br>C11   6   5   8   7   3   1<br><br>$\lambda_{\max}=6.2565$ , CR= 0.04<0.10 |

Table S7 Tree A-B, B-C judgment matrix (Expert 8, from the plant ecological protection industry)

| Tree A-B judgment matrix                                                                                                   | Tree B1-C judgment matrix                                                             | Tree B2-C judgment matrix                                                                                                       | Tree B3-C judgment matrix                                                                                                                                                                                                                                                                             |
|----------------------------------------------------------------------------------------------------------------------------|---------------------------------------------------------------------------------------|---------------------------------------------------------------------------------------------------------------------------------|-------------------------------------------------------------------------------------------------------------------------------------------------------------------------------------------------------------------------------------------------------------------------------------------------------|
| A   B1   B2   B3<br>B1   1   1/5   1/4<br>B2   5   1   2<br>B3   4   1/2   1<br><br>$\lambda_{\max}=3.0246$ , CR=0.02<0.10 | B1   C1   C2<br>C1   1   1/6<br><br>C2   6   1<br><br>$\lambda_{\max}=2$ , CR= 0<0.10 | B2   C3   C4   C5<br>C3   1   5   3<br><br>C4   1/5   1   1/3<br>C5   1/3   3   1<br><br>$\lambda_{\max}=3.0385$ , CR=0.04<0.10 | B3   C6   C7   C8   C9   C10   C11<br>C6   1   1/7   3   1/5   1/4   1/3<br>C7   7   1   8   3   5   6<br>C8   1/3   1/8   1   1/7   1/6   1/5<br>C9   5   1/3   7   1   3   4<br>C10   4   1/5   6   1/3   1   3<br>C11   3   1/6   5   1/4   1/3   1<br><br>$\lambda_{\max}=6.4766$ , CR= 0.08<0.10 |

| Shrub A-B judgment matrix                                                                                                  | Shrub B1-C judgment matrix                                                            | Shrub B2-C judgment matrix                                                                                                      | Shrub B3-C judgment matrix                                                                                                                                                                                                                                                                           |
|----------------------------------------------------------------------------------------------------------------------------|---------------------------------------------------------------------------------------|---------------------------------------------------------------------------------------------------------------------------------|------------------------------------------------------------------------------------------------------------------------------------------------------------------------------------------------------------------------------------------------------------------------------------------------------|
| A   B1   B2   B3<br>B1   1   1/3   1/3<br>B2   3   1   1/2<br>B3   3   2   1<br><br>$\lambda_{\max}=3.0536$ , CR=0.05<0.10 | B1   C1   C2<br>C1   1   1/3<br><br>C2   3   1<br><br>$\lambda_{\max}=2$ , CR= 0<0.10 | B2   C3   C4   C5<br>C3   1   5   3<br><br>C4   1/5   1   1/4<br>C5   1/3   4   1<br><br>$\lambda_{\max}=3.0385$ , CR=0.04<0.10 | B3   C6   C7   C8   C9   C10   C11<br>C6   1   1/8   1/4   1/3   1/5   1/2<br>C7   8   1   5   6   3   7<br>C8   6   1/5   1   2   1/3   4<br>C9   3   1/6   1/2   1   1/4   2<br>C10   7   1/3   3   4   1   6<br>C11   2   1/7   1/4   1/2   1/6   1<br><br>$\lambda_{\max}=6.041$ , CR= 0.06<0.10 |

| Herbaceous plant A-B judgment matrix                                                                                               | Herbaceous plant B1-C judgment matrix                                                 | Herbaceous plant B2-C judgment matrix                                                                                           | Herbaceous plant B3-C judgment matrix                                                                                                                                                                                                                                                                 |
|------------------------------------------------------------------------------------------------------------------------------------|---------------------------------------------------------------------------------------|---------------------------------------------------------------------------------------------------------------------------------|-------------------------------------------------------------------------------------------------------------------------------------------------------------------------------------------------------------------------------------------------------------------------------------------------------|
| A   B1   B2   B3<br>B1   1   1/2   1/2<br><br>B2   2   1   1/2<br><br>B3   2   2   1<br><br>$\lambda_{\max}=3.0536$ , CR=0.05<0.10 | B1   C1   C2<br>C1   1   1/2<br><br>C2   2   1<br><br>$\lambda_{\max}=2$ , CR= 0<0.10 | B2   C3   C4   C5<br>C3   1   5   3<br><br>C4   1/5   1   1/2<br>C5   1/3   2   1<br><br>$\lambda_{\max}=3.0858$ , CR=0.08<0.10 | B3   C6   C7   C8   C9   C10   C11<br>C6   1   1/2   1/5   3   1/6   1/3<br>C7   2   1   1/4   5   1/5   1/2<br>C8   5   4   1   7   1/2   2<br>C9   1/3   1/5   1/7   1   1/8   1/6<br>C10   6   5   2   8   1   4<br>C11   3   2   1/2   6   1/4   1<br><br>$\lambda_{\max}=6.2184$ , CR= 0.03<0.10 |

Table S8 Tree A-B, B-C judgment matrix (Expert 9, from the plant ecological protection industry)

| Tree A-B judgment matrix                                                                                                   | Tree B1-C judgment matrix                                                             | Tree B2-C judgment matrix                                                                                                           | Tree B3-C judgment matrix                                                                                                                                                                                                                                                                              |
|----------------------------------------------------------------------------------------------------------------------------|---------------------------------------------------------------------------------------|-------------------------------------------------------------------------------------------------------------------------------------|--------------------------------------------------------------------------------------------------------------------------------------------------------------------------------------------------------------------------------------------------------------------------------------------------------|
| A   B1   B2   B3<br>B1   1   1/6   1/5<br>B2   6   1   2<br>B3   5   1/2   1<br><br>$\lambda_{\max}=3.0291$ , CR=0.03<0.10 | B1   C1   C2<br>C1   1   1/6<br><br>C2   6   1<br><br>$\lambda_{\max}=2$ , CR= 0<0.10 | B2   C3   C4   C5<br>C3   1   7   3<br><br>C4   1/7   1   1/4<br><br>C5   1/3   4   1<br><br>$\lambda_{\max}=3.0324$ , CR=0.03<0.10 | B3   C6   C7   C8   C9   C10   C11<br>C6   1   4   1/6   1/5   6   1/4<br>C7   1/4   1   1/7   1/6   3   1/5<br>C8   6   7   1   2   8   5<br>C9   5   6   1/2   1   7   2<br>C10   1/5   1/3   1/8   1/7   1   1/6<br>C11   4   5   1/5   1/2   6   1<br><br>$\lambda_{\max}=6.6062$ , CR= 0.096<0.10 |

| Shrub A-B judgment matrix                                                                                                  | Shrub B1-C judgment matrix                                                            | Shrub B2-C judgment matrix                                                                                                   | Shrub B3-C judgment matrix                                                                                                                                                                                                                                                                            |
|----------------------------------------------------------------------------------------------------------------------------|---------------------------------------------------------------------------------------|------------------------------------------------------------------------------------------------------------------------------|-------------------------------------------------------------------------------------------------------------------------------------------------------------------------------------------------------------------------------------------------------------------------------------------------------|
| A   B1   B2   B3<br>B1   1   1/6   1/4<br>B2   6   1   3<br>B3   4   1/3   1<br><br>$\lambda_{\max}=3.0536$ , CR=0.05<0.10 | B1   C1   C2<br>C1   1   1/3<br><br>C2   3   1<br><br>$\lambda_{\max}=2$ , CR= 0<0.10 | B2   C3   C4   C5<br>C3   1   6   3<br><br>C4   1/6   1   1/2<br><br>C5   1/3   2   1<br><br>$\lambda_{\max}=3$ , CR= 0<0.10 | B3   C6   C7   C8   C9   C10   C11<br>C6   1   1/7   1/5   2   1/6   1/3<br>C7   7   1   3   9   2   5<br>C8   5   1/3   1   6   1/2   3<br>C9   1/2   1/9   1/6   1   1/8   1/4<br>C10   7   1/2   2   8   1   4<br>C11   3   1/5   1/3   4   1/4   1<br><br>$\lambda_{\max}=6.2146$ , CR= 0.03<0.10 |

| Herbaceous plant A-B judgment matrix                                                                                       | Herbaceous plant B1-C judgment matrix                                                 | Herbaceous plant B2-C judgment matrix                                                                                               | Herbaceous plant B3-C judgment matrix                                                                                                                                                                                                                                                                |
|----------------------------------------------------------------------------------------------------------------------------|---------------------------------------------------------------------------------------|-------------------------------------------------------------------------------------------------------------------------------------|------------------------------------------------------------------------------------------------------------------------------------------------------------------------------------------------------------------------------------------------------------------------------------------------------|
| A   B1   B2   B3<br>B1   1   3   1/4<br>B2   1/3   1   1/5<br>B3   4   5   1<br><br>$\lambda_{\max}=3.0858$ , CR=0.08<0.10 | B1   C1   C2<br>C1   1   1/7<br><br>C2   7   1<br><br>$\lambda_{\max}=2$ , CR= 0<0.10 | B2   C3   C4   C5<br>C3   1   4   3<br><br>C4   1/4   1   1/2<br><br>C5   1/3   2   1<br><br>$\lambda_{\max}=3.0183$ , CR=0.02<0.10 | B3   C6   C7   C8   C9   C10   C11<br>C6   1   1/7   1/5   4   1/6   1/3<br>C7   7   1   3   8   2   4<br>C8   5   1/3   1   6   1/2   2<br>C9   1/4   1/8   1/6   1   1/7   1/5<br>C10   6   1/2   2   7   1   5<br>C11   3   1/4   1/2   5   1/5   1<br><br>$\lambda_{\max}=3.658$ , CR= 0.06<0.10 |



Table S9 The final weight distribution of the ratings given by 9 experts to the tree matrix

| A   | Expert 1 | Expert 2 | Expert 3 | Expert 4 | Expert 5 | Expert 6 | Expert 7 | Expert 8 | Expert 9 | Average value |
|-----|----------|----------|----------|----------|----------|----------|----------|----------|----------|---------------|
| B1  | 0.1958   | 0.0964   | 0.0754   | 0.0719   | 0.1998   | 0.0782   | 0.1007   | 0.0974   | 0.0811   | 0.1107        |
| B2  | 0.3108   | 0.4923   | 0.6955   | 0.6491   | 0.1168   | 0.1713   | 0.2255   | 0.5695   | 0.5769   | 0.4232        |
| B3  | 0.4934   | 0.4113   | 0.2290   | 0.2790   | 0.6833   | 0.7504   | 0.6738   | 0.3331   | 0.3420   | 0.4661        |
|     |          |          |          |          |          |          |          |          |          |               |
| B1  | Expert 1 | Expert 2 | Expert 3 | Expert 4 | Expert 5 | Expert 6 | Expert 7 | Expert 8 | Expert 9 | Average value |
| C1  | 0.3333   | 0.1111   | 0.2500   | 0.1667   | 0.1429   | 0.1111   | 0.2000   | 0.1429   | 0.1429   | 0.1779        |
| C2  | 0.6667   | 0.8889   | 0.7500   | 0.8333   | 0.8571   | 0.8889   | 0.8000   | 0.8571   | 0.8571   | 0.8221        |
|     |          |          |          |          |          |          |          |          |          |               |
| B2  | Expert 1 | Expert 2 | Expert 3 | Expert 4 | Expert 5 | Expert 6 | Expert 7 | Expert 8 | Expert 9 | Average value |
| C3  | 0.6910   | 0.6612   | 0.6910   | 0.1047   | 0.2872   | 0.6483   | 0.1865   | 0.6370   | 0.6586   | 0.5073        |
| C4  | 0.2176   | 0.0670   | 0.2176   | 0.6370   | 0.6348   | 0.1220   | 0.6870   | 0.1047   | 0.0786   | 0.3074        |
| C5  | 0.0914   | 0.2718   | 0.0914   | 0.2583   | 0.0780   | 0.2297   | 0.1265   | 0.2583   | 0.2628   | 0.1853        |
|     |          |          |          |          |          |          |          |          |          |               |
| B2  | Expert 1 | Expert 2 | Expert 3 | Expert 4 | Expert 5 | Expert 6 | Expert 7 | Expert 8 | Expert 9 | Average value |
| C6  | 0.2133   | 0.1823   | 0.0559   | 0.4543   | 0.2221   | 0.449    | 0.1395   | 0.0472   | 0.0876   | 0.2057        |
| C7  | 0.0710   | 0.0775   | 0.3930   | 0.1340   | 0.0336   | 0.0344   | 0.0336   | 0.4554   | 0.0424   | 0.1417        |
| C8  | 0.4905   | 0.0423   | 0.0355   | 0.0426   | 0.0936   | 0.0848   | 0.0775   | 0.0270   | 0.4234   | 0.1464        |
| C9  | 0.1454   | 0.378    | 0.0834   | 0.2735   | 0.4492   | 0.2359   | 0.0488   | 0.2445   | 0.2537   | 0.2347        |
| C10 | 0.0472   | 0.0283   | 0.1729   | 0.023    | 0.1448   | 0.0471   | 0.2287   | 0.1417   | 0.0265   | 0.0956        |
| C11 | 0.0327   | 0.2916   | 0.2593   | 0.0726   | 0.0566   | 0.1488   | 0.4719   | 0.0842   | 0.1664   | 0.1760        |

Table S10 The final weight distribution of the ratings given by 9 experts to the shrub matrix

| A  | Expert 1 | Expert 2 | Expert 3 | Expert 4 | Expert 5 | Expert 6 | Expert 7 | Expert 8 | Expert 9 | Average value |
|----|----------|----------|----------|----------|----------|----------|----------|----------|----------|---------------|
| B1 | 0.1007   | 0.0719   | 0.1095   | 0.0668   | 0.1007   | 0.0936   | 0.122    | 0.1396   | 0.0852   | 0.0989        |
| B2 | 0.2255   | 0.6491   | 0.5816   | 0.6406   | 0.2255   | 0.2797   | 0.3196   | 0.3325   | 0.6442   | 0.4331        |
| B3 | 0.6738   | 0.279    | 0.309    | 0.2926   | 0.6738   | 0.6267   | 0.5584   | 0.5278   | 0.2706   | 0.4680        |
|    |          |          |          |          |          |          |          |          |          |               |
| B1 | Expert 1 | Expert 2 | Expert 3 | Expert 4 | Expert 5 | Expert 6 | Expert 7 | Expert 8 | Expert 9 | Average value |
| C1 | 0.1667   | 0.25     | 0.1667   | 0.3333   | 0.1667   | 0.1667   | 0.25     | 0.25     | 0.25     | 0.2222        |
| C2 | 0.8333   | 0.75     | 0.8333   | 0.6667   | 0.8333   | 0.8333   | 0.75     | 0.75     | 0.75     | 0.7778        |
|    |          |          |          |          |          |          |          |          |          |               |
| B2 | Expert 1 | Expert 2 | Expert 3 | Expert 4 | Expert 5 | Expert 6 | Expert 7 | Expert 8 | Expert 9 | Average       |

|    |        |        |        |        |        |        |        |        |        | value  |
|----|--------|--------|--------|--------|--------|--------|--------|--------|--------|--------|
| C3 | 0.6442 | 0.687  | 0.6483 | 0.1047 | 0.2255 | 0.2255 | 0.2255 | 0.637  | 0.6667 | 0.4516 |
| C4 | 0.2706 | 0.1865 | 0.2297 | 0.2583 | 0.6738 | 0.1007 | 0.6738 | 0.1047 | 0.1111 | 0.2899 |
| C5 | 0.0852 | 0.1265 | 0.122  | 0.637  | 0.1007 | 0.6738 | 0.1007 | 0.2583 | 0.2222 | 0.2585 |

| B2  | Expert 1 | Expert 2 | Expert 3 | Expert 4 | Expert 5 | Expert 6 | Expert 7 | Expert 8 | Expert 9 | Average value |
|-----|----------|----------|----------|----------|----------|----------|----------|----------|----------|---------------|
| C6  | 0.4167   | 0.1476   | 0.2381   | 0.4484   | 0.1721   | 0.1591   | 0.062    | 0.035    | 0.0428   | 0.1913        |
| C7  | 0.1356   | 0.0265   | 0.1508   | 0.1339   | 0.0292   | 0.311    | 0.0366   | 0.4579   | 0.3948   | 0.1863        |
| C8  | 0.2931   | 0.0366   | 0.0351   | 0.0513   | 0.0503   | 0.081    | 0.1096   | 0.133    | 0.175    | 0.1072        |
| C9  | 0.0326   | 0.08     | 0.0796   | 0.2572   | 0.2487   | 0.3867   | 0.1562   | 0.0746   | 0.0288   | 0.1494        |
| C10 | 0.0732   | 0.4198   | 0.0431   | 0.028    | 0.4159   | 0.0261   | 0.3834   | 0.2536   | 0.2726   | 0.2129        |
| C11 | 0.0487   | 0.2895   | 0.4533   | 0.0813   | 0.0837   | 0.0361   | 0.2522   | 0.0459   | 0.0861   | 0.1530        |

Table S11 The final weight distribution of the ratings given by 9 experts to the herbaceous plant matrix

| A  | Expert 1 | Expert 2 | Expert 3 | Expert 4 | Expert 5 | Expert 6 | Expert 7 | Expert 8 | Expert 9 | Average value |
|----|----------|----------|----------|----------|----------|----------|----------|----------|----------|---------------|
| B1 | 0.0852   | 0.0936   | 0.1220   | 0.1047   | 0.1571   | 0.0864   | 0.1168   | 0.1958   | 0.2255   | 0.1319        |
| B2 | 0.6442   | 0.6267   | 0.5584   | 0.2583   | 0.2493   | 0.6282   | 0.1998   | 0.3108   | 0.1007   | 0.3974        |
| B3 | 0.2706   | 0.2797   | 0.3196   | 0.6370   | 0.5936   | 0.2854   | 0.6833   | 0.4934   | 0.6738   | 0.4707        |

| B1 | Expert 1 | Expert 2 | Expert 3 | Expert 4 | Expert 5 | Expert 6 | Expert 7 | Expert 8 | Expert 9 | Average value |
|----|----------|----------|----------|----------|----------|----------|----------|----------|----------|---------------|
| C1 | 0.2500   | 0.2500   | 0.1429   | 0.1667   | 0.2000   | 0.1429   | 0.2000   | 0.3333   | 0.1250   | 0.2012        |
| C2 | 0.7500   | 0.7500   | 0.8571   | 0.8333   | 0.8000   | 0.8571   | 0.8000   | 0.6667   | 0.8750   | 0.7988        |

| B2 | Expert 1 | Expert 2 | Expert 3 | Expert 4 | Expert 5 | Expert 6 | Expert 7 | Expert 8 | Expert 9 | Average value |
|----|----------|----------|----------|----------|----------|----------|----------|----------|----------|---------------|
| C3 | 0.2297   | 0.7103   | 0.6250   | 0.1007   | 0.1172   | 0.1947   | 0.1007   | 0.6267   | 0.6250   | 0.3700        |
| C4 | 0.1220   | 0.1710   | 0.2385   | 0.2255   | 0.6144   | 0.0881   | 0.2255   | 0.0936   | 0.1365   | 0.2128        |
| C5 | 0.6483   | 0.1187   | 0.1365   | 0.6738   | 0.2684   | 0.7172   | 0.6738   | 0.2797   | 0.2385   | 0.4172        |

| B2  | Expert 1 | Expert 2 | Expert 3 | Expert 4 | Expert 5 | Expert 6 | Expert 7 | Expert 8 | Expert 9 | Average value |
|-----|----------|----------|----------|----------|----------|----------|----------|----------|----------|---------------|
| C6  | 0.3628   | 0.1228   | 0.2425   | 0.4311   | 0.4352   | 0.4612   | 0.0762   | 0.0581   | 0.0514   | 0.2490        |
| C7  | 0.2337   | 0.0319   | 0.1386   | 0.0751   | 0.0341   | 0.0305   | 0.1306   | 0.0924   | 0.3777   | 0.1271        |
| C8  | 0.0669   | 0.4479   | 0.0800   | 0.2572   | 0.0531   | 0.277    | 0.0333   | 0.2612   | 0.1647   | 0.1824        |
| C9  | 0.2171   | 0.0522   | 0.0236   | 0.0586   | 0.1324   | 0.1134   | 0.0481   | 0.0290   | 0.0274   | 0.0780        |
| C10 | 0.0316   | 0.2551   | 0.0390   | 0.0296   | 0.0872   | 0.0711   | 0.2458   | 0.4125   | 0.2810   | 0.1614        |
| C11 | 0.088    | 0.0900   | 0.4763   | 0.1483   | 0.2579   | 0.0468   | 0.4661   | 0.1469   | 0.0977   | 0.2020        |
